# Supplementary material for: Strategies for Efficient Expression of Heterologous Monosaccharide Transporters in Saccharomyces cerevisiae
Source: MDPI journal article supplement (doi:10.3390/jof8010084), 2022-01-15
Supplement: s1 [file s1]

Supplementary Material:

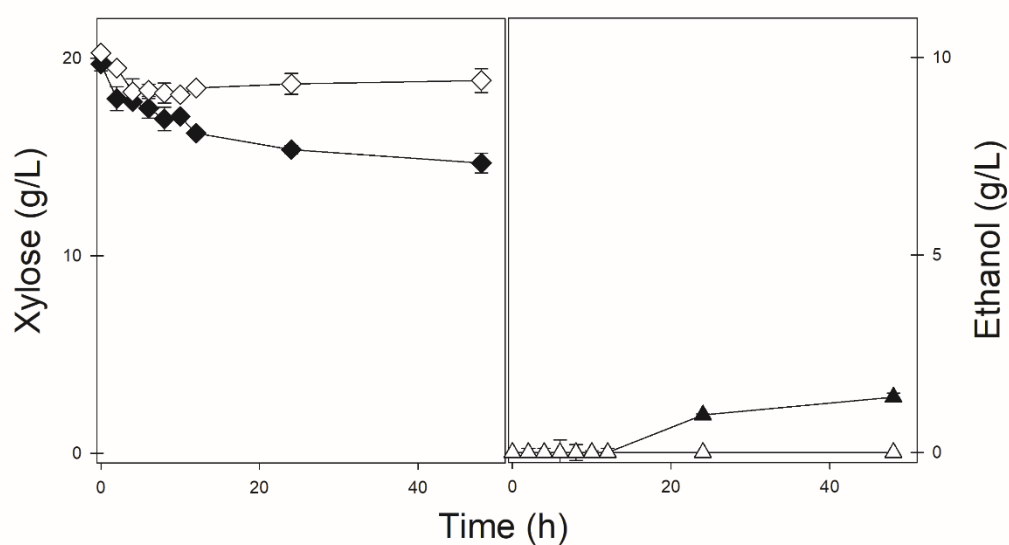

**Supplementary Figure S1.** Xylose fermentation under microaerobic conditions by the DLG-K1 strain transformed with the pGPD-*SaXUT1* (open symbols) or pGPD-*SaXUT1*ΔNC (black symbols) plasmids. The batch fermentation was performed with high cell concentrations (10 g DCW/L), at 30°C, and the concentration of xylose (diamonds) and ethanol (triangles) in the medium were determined at the indicated time points.

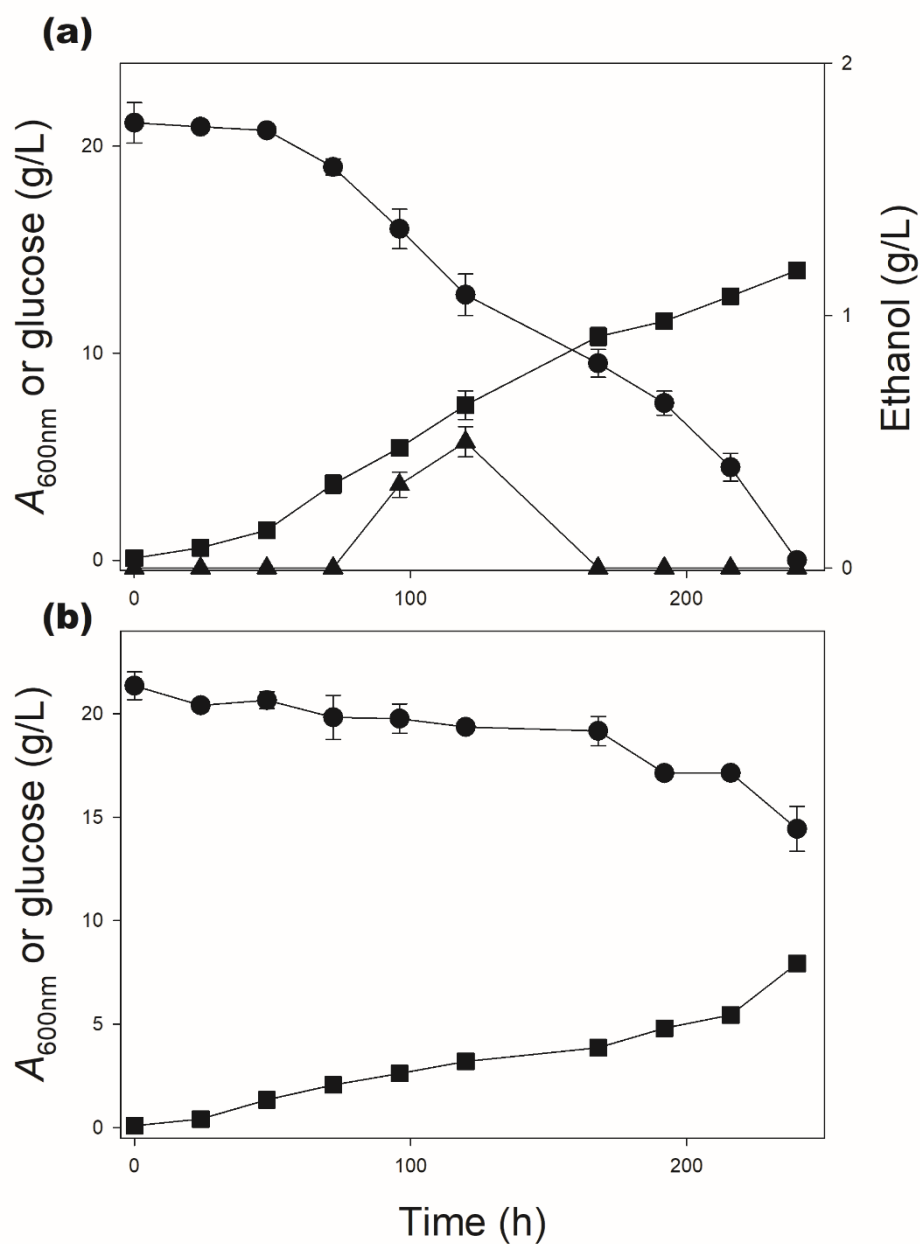

**Supplementary Figure S2.** Aerobic growth of strain DLG-K1ΔR3 transformed with plasmid pPGK-*SpXUT1* (a) or plasmid pGPD-*SaXUT1* (b) in O-YNB medium (lacking uracil) containing 2% glucose, at 30°C. At the indicated time points the cell growth (squares), glucose (circles), and ethanol (triangles) concentrations were determined. No ethanol was produced during glucose consumption by strain DLG-K1ΔR3 transformed with plasmid pGPD-*SaXUT1* (b).
